# Supplementary material
Source: Springer Nature journal article supplement (https://www.springermedizin.de/resource/supplementary/13643_2014_317_MOESM1_ESM.pdf/9681766)

(a)

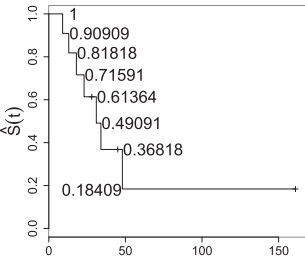

(b)

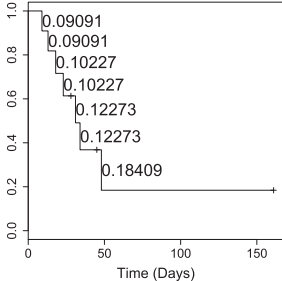

(c)

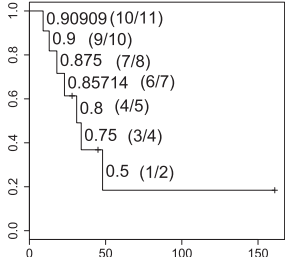

Supplement: MOESM1 [file 9681766]
